# Supplementary material for: Correlation between molecular weight and confined crystallization behavior of polymers grafted onto a zero-dimensional filler
Source: Royal Society of Chemistry journal article supplement (doi:10.1039/c9ce01606f), 2020-01-01
Supplement: c9ce01606f1.pdf [file c9ce01606f1.pdf]

# Supporting information

## Correlation between Molecular Weight and Confined Crystallization Behavior of Polymers Grafted on Zero- dimensional Filler

Tongfan Hao<sup>ab</sup>, Ding Xu<sup>c</sup>, Yongqiang Ming<sup>c</sup>, Shuihua Zhang<sup>c</sup>, Yangyang Wei<sup>c</sup>, Zhiping Zhou<sup>c\*</sup>, Yijing Nie<sup>c\*</sup>, Deyue Yan<sup>b</sup>

<sup>a</sup> *Institute of Green Chemistry and Chemical Technology, School of Chemistry and Chemical Engineering, Jiangsu University, 301 Xuefu Road, Zhenjiang 212013, China*

<sup>b</sup> *School of Chemistry & Chemical Engineering, Shanghai Jiao Tong University, 800 Dongchuan Road, Shanghai 200240, China*

<sup>c</sup> *Institute of Polymer Materials, School of Materials Science and Engineering, Jiangsu University, 301 Xuefu Road, Zhenjiang 212013, China*

The conventional Metropolis sampling algorithm was used for each attempt of segment motion. The corresponding change of the potential energy is

$$\Delta E = \Delta c \cdot E_c + \Delta p \cdot E_p$$

where  $E_c$  is the potential energy change due to non-collinear connection of consecutive bonds along the chain, which can be used to reflect chain flexibility,  $E_p$  is the potential energy change due to each pair of nonparallel packed bonds, reflecting molecular driving force for polymer crystallization,  $\Delta c$  is the net change of the number of non-collinear connection pairs of bonds and  $\Delta p$  is the net change of the number of pairs of nonparallel packed bonds. In the current simulations, the ratio of nonparallel-packed bonds potential to non-collinear potential, i.e.,  $E_p/E_c$ , was set to 1

---

\*Corresponding author. E-mail address: zhouzp@ujs.edu.cn (Z.P. Zhou), nieyijing@ujs.edu.cn (Y.J. Nie).

to achieve a proper flexibility of chains at crystallization temperatures, and  $kT/E_c$  ( $k$  is the Boltzmann's constant and  $T$  is the temperature) represents the reduced system temperature (below simplified as  $T^*$ ).
